# Supplementary material
Source: publisher figshare collection journal article supplement (https://frontiersin.figshare.com/ndownloader/files/35495873)
Supplement: Supplementary file [file 35495873]

## Supplementary Material

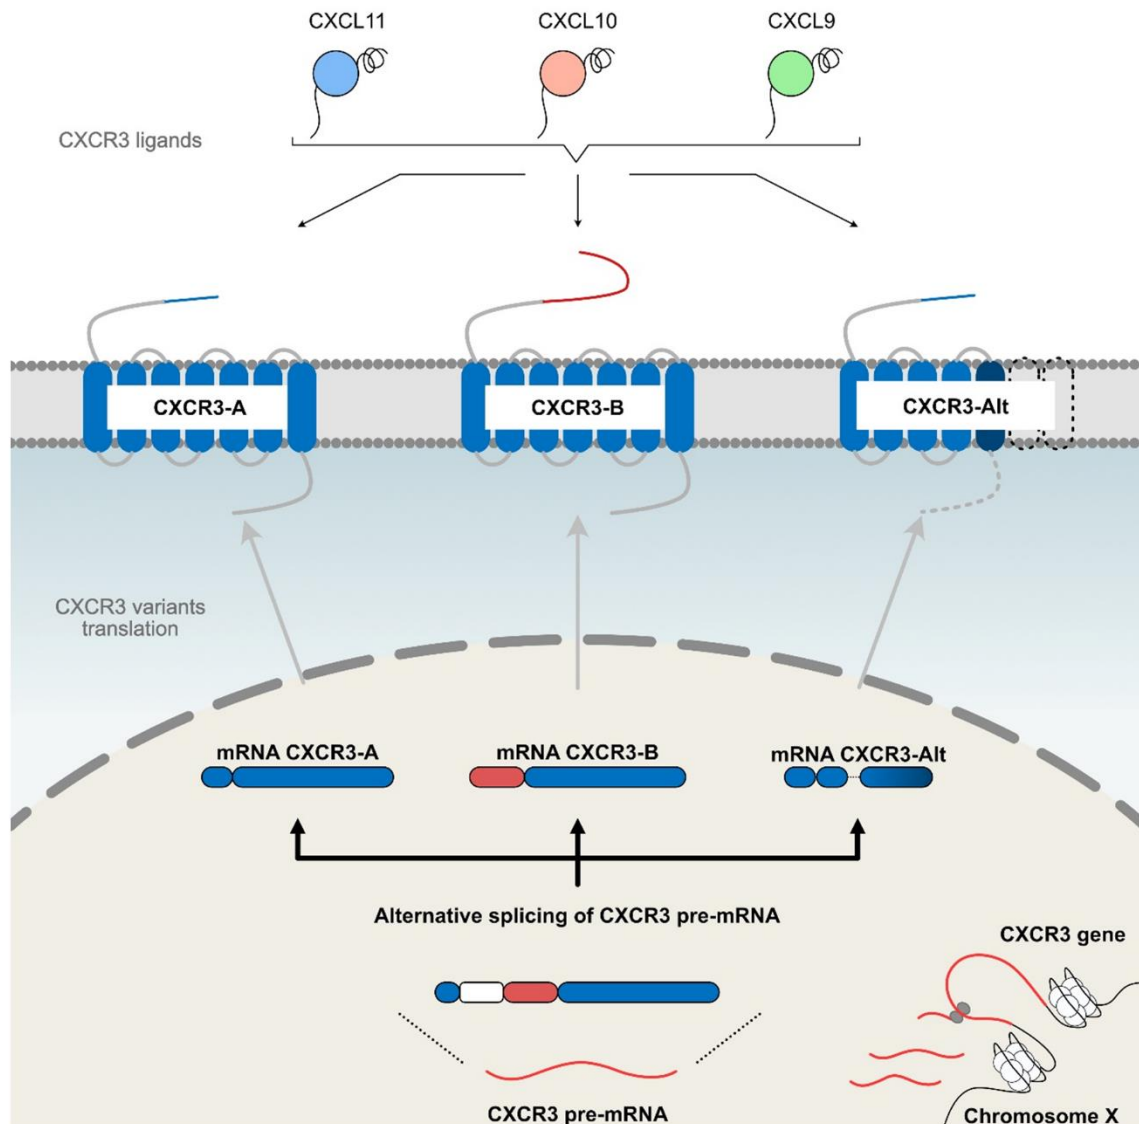

**Supplementary figure 1.** Overview of the three CXCR3 isoforms. Due to alternative splicing of the pre-mRNA of the CXCR3 gene, located on chromosome X, three CXCR3 isoforms can be generated. The CXCR3-A isoform is the product of the splicing of the exon 1 and exon 3 within the CXCR3 gene. The assembly of exon 2 and exon 3 results in the CXCR3-B isoform which has an N terminus longer by 47 amino acids compared with CXCR3-A. The removal of the intron, exon 2 and a 337-bp region within the third exon during RNA splicing results in the CXCR3-Alt isoform that comprises the N terminus and the first four transmembrane domains identical to CXCR3-A as well as a possible fifth transmembrane region and a C terminus, which are different from CXCR3-A or CXCR3-B. All CXCR3 isoforms are able to bind three endogenous ligands CXCL9, CXCL10 and CXCL11, each with a different binding affinity and activation potential.

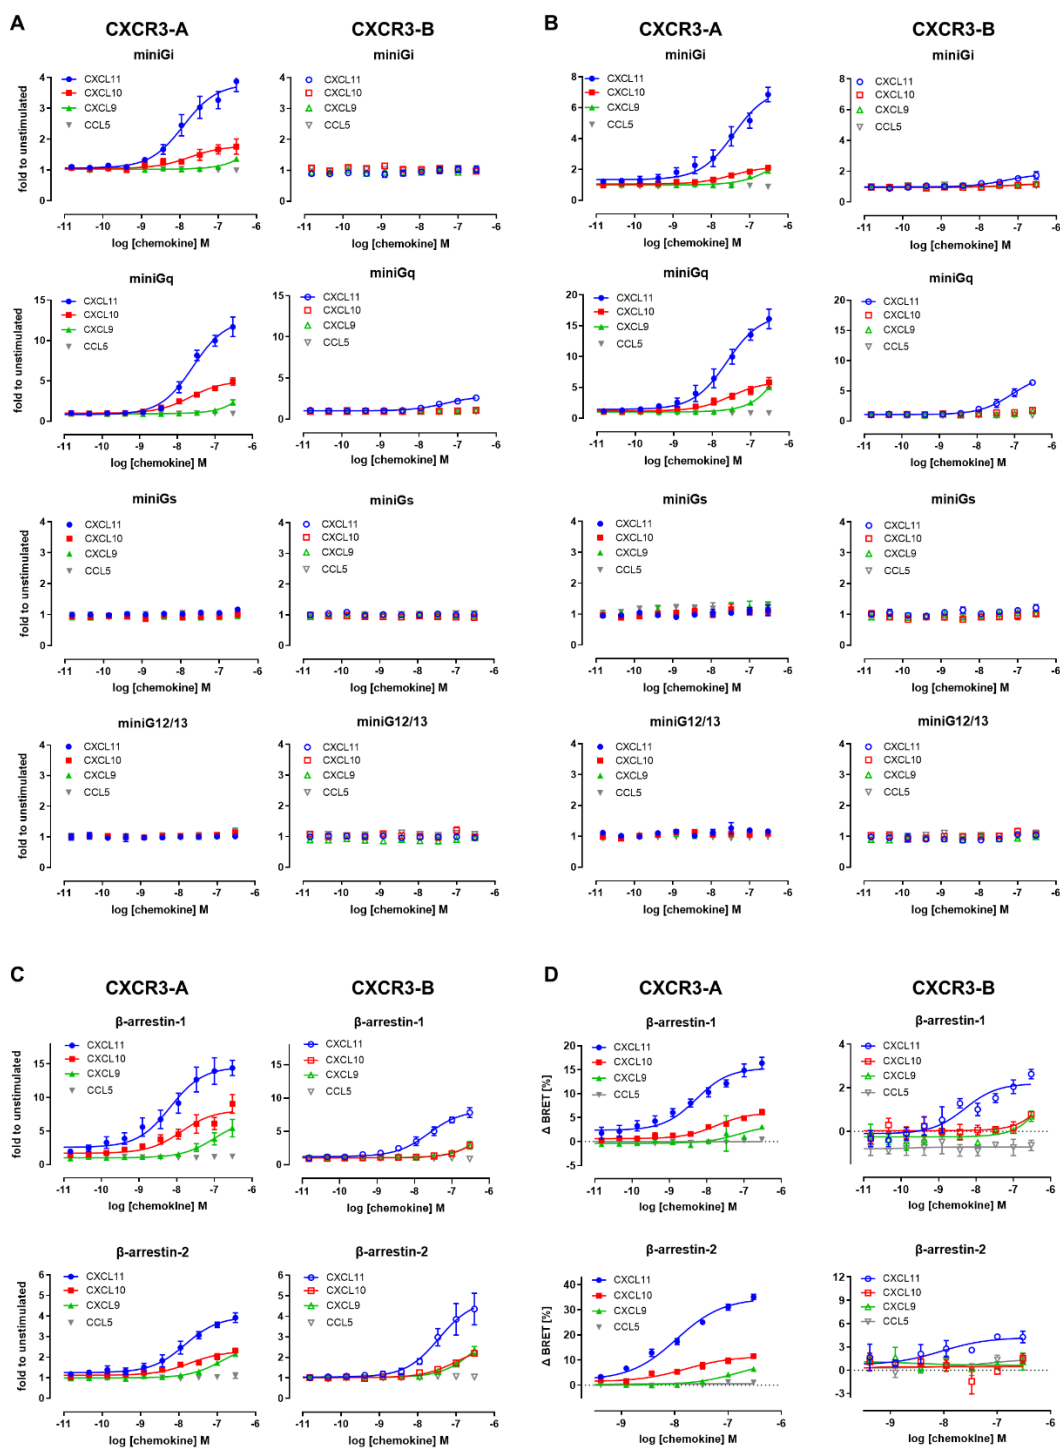

**Supplementary figure 2.** (A–B) Chemokine-induced recruitment of miniGi, miniGq, miniGs and miniG12/13 protein to CXCR3-A and CXCR3-B monitored by NanoBiT-based assay in HEK293T (A) or U-87 MG cells (B). (C) Chemokine-induced  $\beta$ -arrestin-1 and  $\beta$ -arrestin-2 recruitment to CXCR3-A and CXCR3-B after chemokine stimulation in U-87 MG cells using nanoluciferase complementation assay. (D) Chemokine-induced  $\beta$ -arrestin-1 and  $\beta$ -arrestin-2 recruitment to CXCR3-A or CXCR3-B monitored by NanoBRET assay in HEK293T cells. Data represent mean  $\pm$  SEM of three independent experiments.

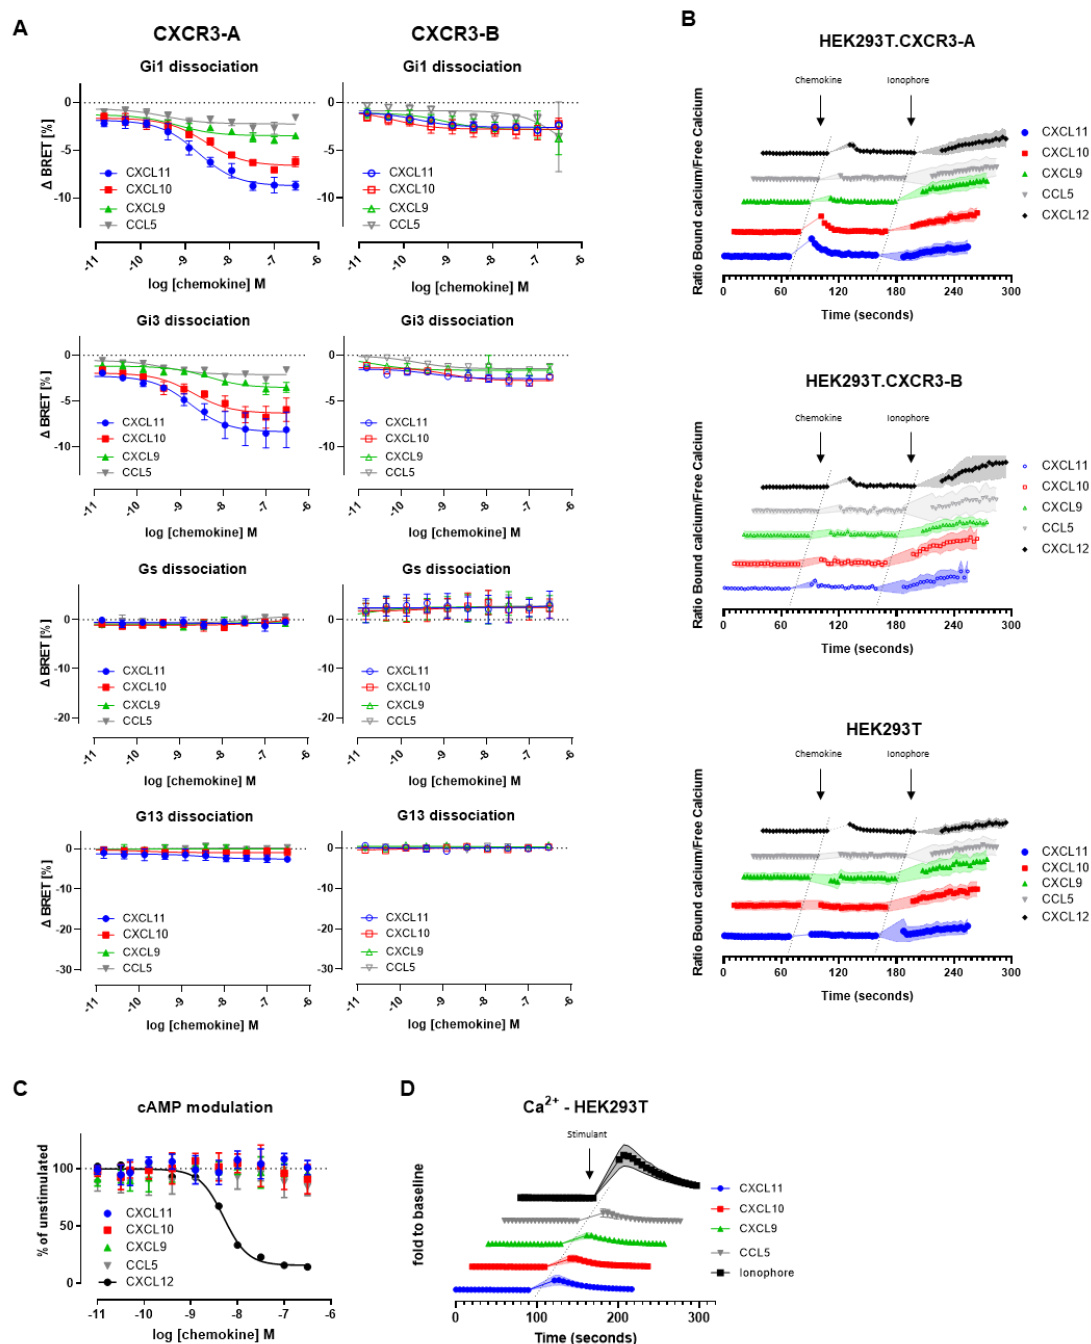

**Supplementary figure 3.** (A) Chemokine-induced heterotrimeric G protein dissociation profiles for Gi1, Gi3, Gs, G13 monitored in CXCR3-A- or CXCR3-B-expressing HEK293T cells by NanoBRET. (B) Mobilization of intracellular calcium in HEK293T cells stably expressing CXCR3-A or CXCR3-B or in naïve HEK293T cells in response to CXC or CC chemokines (100 nM) monitored with the ratiometric fluorescent indicator Indo-1 AM. Calcium ionophore A23187 (1  $\mu$ M) was used as receptor-independent control. (C–D) Downstream G protein signaling in naïve HEK293T cells after treatment with CXCL12, CXCL11, CXCL10, CXCL9 or CCL5 by luminescence-based intracellular cAMP modulation (C) or NanoBiT-based intracellular calcium release (D). CXCL12 or Ionophore A23187 were used as positive control to confirm assay functionality. For all panels, data represent mean  $\pm$  SEM of three independent experiments.

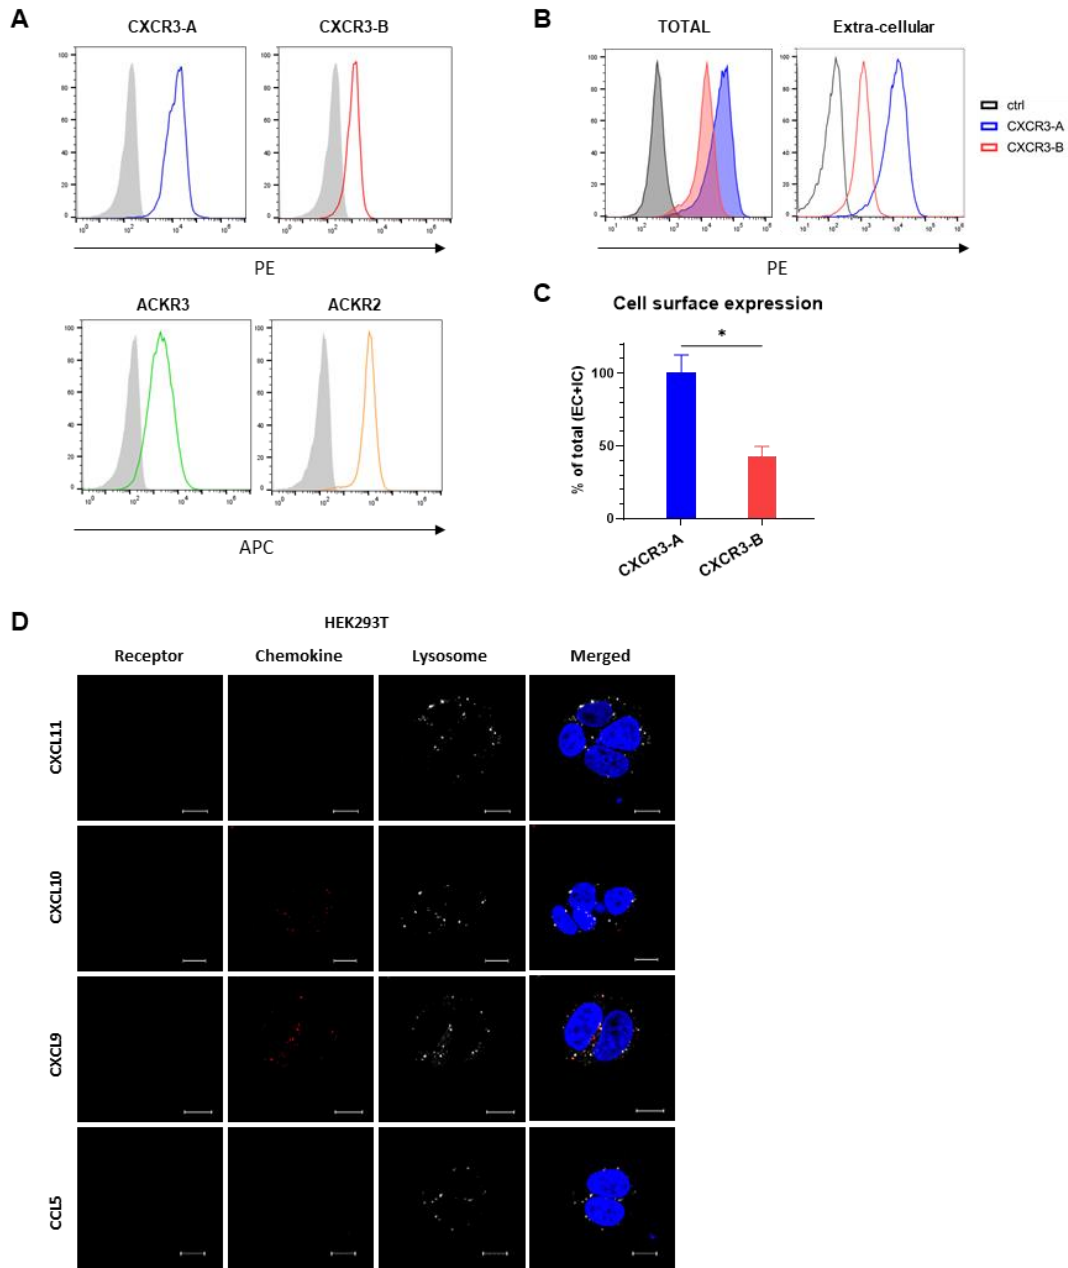

**Supplementary figure 4.** (A) Flow cytometry analysis of stable HEK293T-derived cell lines used in receptor recycling studies. Cell surface expression of CXCR3-A, CXCR3-B, ACKR3 or ACKR2, was evaluated with receptor-specific mAb (clones 1C6, 8F11-M16 and 196124, respectively) and the related isotype controls. (B) Flow cytometry comparison of total or extracellular expression of CXCR3-A and CXCR3-B HEK293T-derived stable cell lines evaluated with mAb 1C6 and related isotype control. (C) Cell surface expression of CXCR3-A and CXCR3-B quantified by HiBiT-mediated nanoluciferase complementation and expressed as percentage of total receptor expression (extracellular and intracellular). \* $p < 0.05$  by Mann-Whitney two-tailed test. (D) Confocal microscopy images of naïve HEK293T cells after 2-hour incubation with CXCR3-related chemokines or CCL5 (100 nM). Alexa Fluor 647-labeled chemokines are represented in red, lysosomes stained with LysoTracker™ Red DND-99, in white and nuclei stained with Hoechst 33342, in blue. Scale bar: 10  $\mu$ m. Pictures are representative of 12 acquired images from three independent experiments.

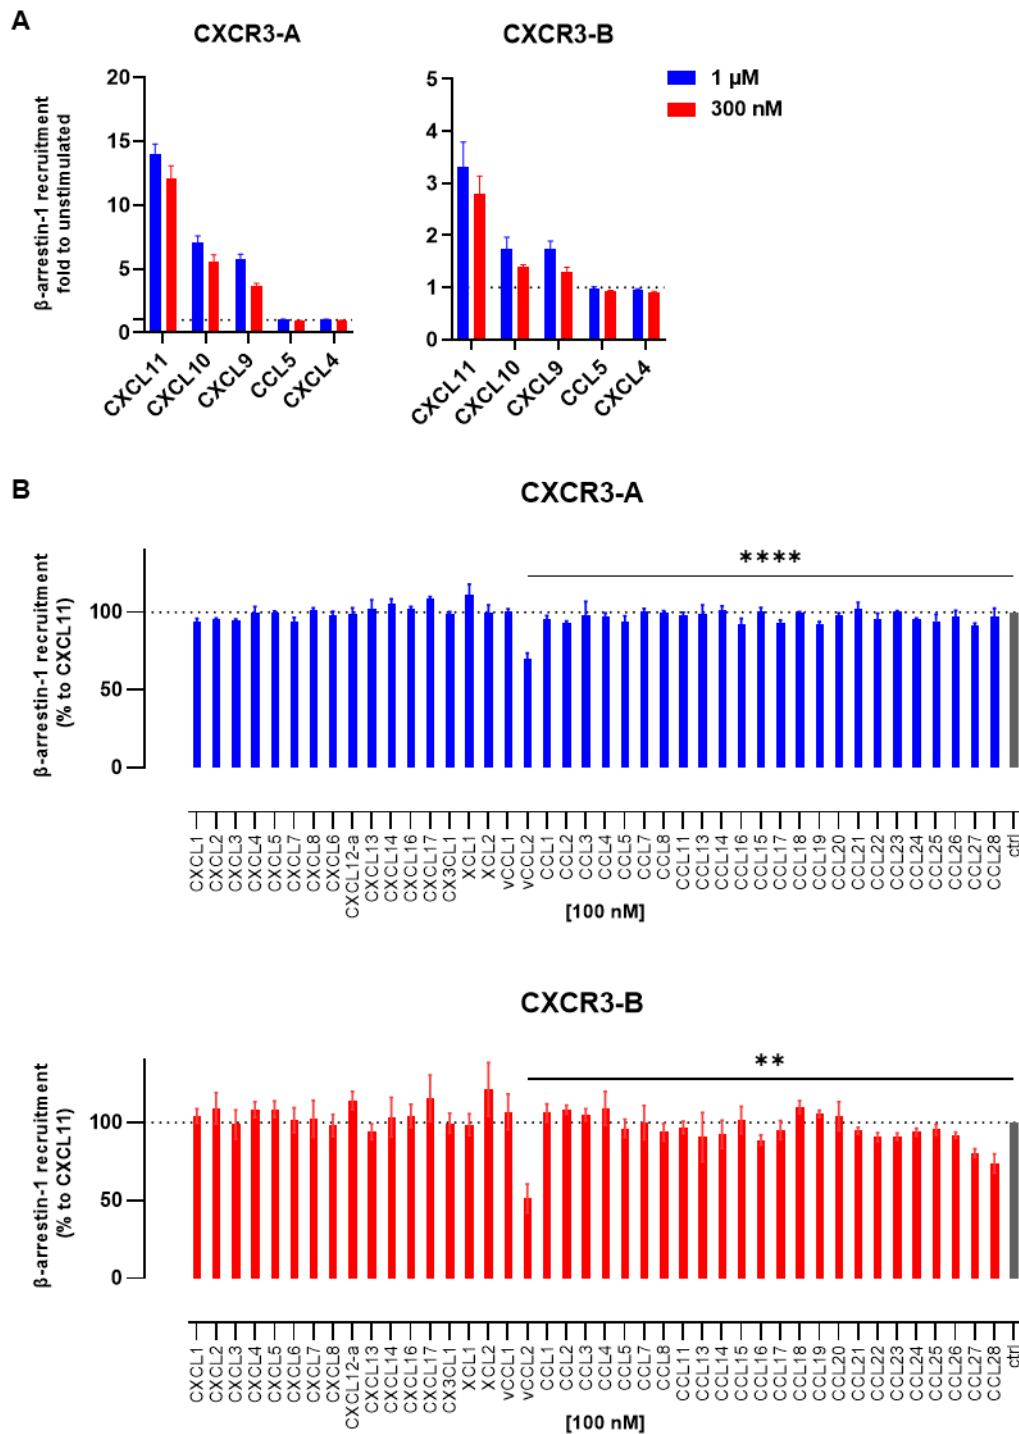

**Supplementary figure 5.** (A)  $\beta$ -arrestin-1 recruitment towards CXCR3-A and CXCR3-B in response to 1  $\mu$ M or 300 nM of CXCL11, CXCL10, CXCL9, CCL5 and CXCL4 monitored by NanoBiT-based assay in HEK293T cells. (B) Antagonistic activity of all non-agonist chemokines (100 nM) towards CXCR3-A or CXCR3-B evaluated following addition of CXCL11 (20 nM) by NanoBiT-based  $\beta$ -arrestin-1 recruitment assay in HEK293T cells. \*\* $p < 0.01$ , \*\*\*\* $p < 0.0001$  by ordinary one-way ANOVA with Bonferroni multiple comparison test was used. For all panels, data represent mean  $\pm$  SEM of three independent experiments.

**Table 1 - CXCR3 variants activation by CXCL11, CXCL10 and CXCL9 (EC<sub>50</sub> nM)**

|                          | CXCR3-A            |                    |                       | CXCR3-B            |                     |                     |
|--------------------------|--------------------|--------------------|-----------------------|--------------------|---------------------|---------------------|
|                          | CXCL11             | CXCL10             | CXCL9                 | CXCL11             | CXCL10              | CXCL9               |
| miniGi recruitment       | 12.4 (7.2 – 21.6)  | 18.2 (3.9 – 74.0)  | ND                    | NA                 | NA                  | NA                  |
| miniGq recruitment       | 25.9 (18.6 – 36.2) | 22.2 (15.0 – 32.9) | ND                    | ND                 | NA                  | NA                  |
| β-arrestin-1 recruitment | 15.8 (10.6 – 23.5) | 17.8 (12.9 – 24.8) | ND                    | 49.4 (36.9 – 66.6) | ND                  | ND                  |
| β-arrestin-2 recruitment | 2.9 (1.8 – 4.8)    | 2.9 (0.8 – 10.2)   | ~ 1.6x10 <sup>4</sup> | 12.4 (7.3 – 21.2)  | 59.2 (23.5 – 159.7) | ~ 1x10 <sup>5</sup> |
| Gi2 dissociation         | 1.2 (0.4 – 3.9)    | 0.9 (0.3 – 2.7)    | 19.9 (5.9 – 54.4)     | NA                 | NA                  | NA                  |
| Go1 dissociation         | 1.8 (0.8 – 4.2)    | 1.9 (1.1 – 3.1)    | 77.8 (34.1 – 201.5)   | ND                 | NA                  | NA                  |
| Gq dissociation          | 0.4 (0.03 – 3.1)   | 2.3 (0.7 – 7.1)    | ~ 56                  | NA                 | NA                  | NA                  |
| cAMP                     | 6.3 (5.0 – 8.0)    | 14.1 (10.5 – 19.0) | 21.9 (12.6 – 38.0)    | NA                 | NA                  | NA                  |

EC<sub>50</sub> values are indicated in nanomolar (nM) with 95% confidence interval (CI).

ND: Not determinable since saturation was not reached.

NA: No activity or activity below 10% of positive control in the concentration range tested

**Table 2 - N-terminally modified chemokines on CXCR3-A and CXCR3-B (EC<sub>50</sub> nM and E<sub>max</sub> %)**

| Chemokines                | CXCR3-A             |                    | CXCR3-B               |                    |
|---------------------------|---------------------|--------------------|-----------------------|--------------------|
|                           | EC <sub>50</sub> nM | E <sub>max</sub> % | EC <sub>50</sub> nM   | E <sub>max</sub> % |
| <b>CXCL11</b>             | 9.6 (5.6 – 16.3)    | 100                | 51.6 (40.7 – 65.3)    | 100.0              |
| CXCL11-CD26               | NA                  | 6.2                | NA                    | 3.9                |
| CXCL11 <sub>3-73</sub>    | NA                  | 7.5                | NA                    | 6.3                |
| CXCL11 <sub>5-73</sub>    | NA                  | 0                  | NA                    | 0.0                |
| CXCL11 <sub>7-73</sub>    | NA                  | 5.8                | NA                    | 1.5                |
| CXCL11 <sub>P2G</sub>     | 14.8 (9.8 – 22.5)   | 42.1               | 152.7 (107.8 – 226.4) | 40.9               |
| CXCL11 <sub>10Nloop</sub> | 28.8 (22.8 – 36.4)  | 67.8               | 269.7 (168.2 – 504.6) | 61.6               |
| CXCL11 <sub>12Nloop</sub> | 99.2 (67.7 – 150.4) | 29.8               | ND                    | 10.6               |
| <b>CXCL10</b>             | 10.7 (6.8 – 16.5)   | 41.7               | ND                    | 13.7               |
| CXCL10-CD26               | NA                  | 1.2                | NA                    | 1.8                |
| <b>CXCL9</b>              | ND                  | 28.1               | ND                    | 15.3               |
| CXCL9-CD26                | NA                  | 9.5                | NA                    | 5.2                |

EC<sub>50</sub> values are indicated in nanomolar (nM) with 95% confidence interval (CI).

E<sub>max</sub> %: maximum signal measured at 300 nM expressed as % of the full agonist CXCL11.

ND: Not determinable since saturation was not reached.

NA: No activity or activity below 10% of positive control in the concentration range tested.

**Table 3 - CXCR3-B N-terminal extension (EC<sub>50</sub> nM and E<sub>max</sub> %)**

| <b>miniGi</b>       | <b>EC<sub>50</sub> nM</b> | <b>E<sub>max</sub> %</b> |
|---------------------|---------------------------|--------------------------|
| CXCR3-A             | 18.2 (9.7 – 34.4)         | 100.0                    |
| CXCR3-B             | NA                        | 0.0                      |
| CXCR3-B -40         | 32.7 (11.4 – 97.2)        | 51.0                     |
| CXCR3-B -30         | 27.2 (6.5 – 128.0)        | 42.4                     |
| CXCR3-B -20         | ND                        | 11.6                     |
| CXCR3-B -10         | ND                        | 10.8                     |
| CXCR4               | 10.3 (4.6 – 23.2)         | 100.0                    |
| <del>CXCR4-B</del>  | ND                        | 11.6                     |
| <b>β-arrestin-1</b> | <b>EC<sub>50</sub> nM</b> | <b>E<sub>max</sub> %</b> |
| CXCR3-A             | 6.7 (2.9 – 14.8)          | 100.0                    |
| CXCR3-B             | 23.9 (14.4 – 39.6)        | 75.9                     |
| CXCR4               | 7.1 (3.8 – 13.3)          | 100.0                    |
| <del>CXCR4-B</del>  | 24.0 (12.6 – 46.1)        | 44.0                     |

EC<sub>50</sub> values are indicated in nanomolar (nM) with 95% confidence interval (CI).

E<sub>max</sub> %: maximum signal measured at 300 nM expressed as % of the full agonist CXCL11.

ND: Not determinable since saturation was not reached.

NA: No activity or activity below 10% of positive control in the concentration range tested

CXCR3 artificial and natural isoforms were stimulated with CXCL11

CXCR4 artificial and natural isoforms were stimulated with CXCL12
